# Supplementary material
Source: Springer Nature journal article supplement (https://www.springermedizin.de/resource/supplementary/12884_2009_217_MOESM5_ESM.pdf/9459864)
Supplement: MOESM5 [file 9459864]

# PITCH - Pregnancy Intervention Trial in Cholestasis

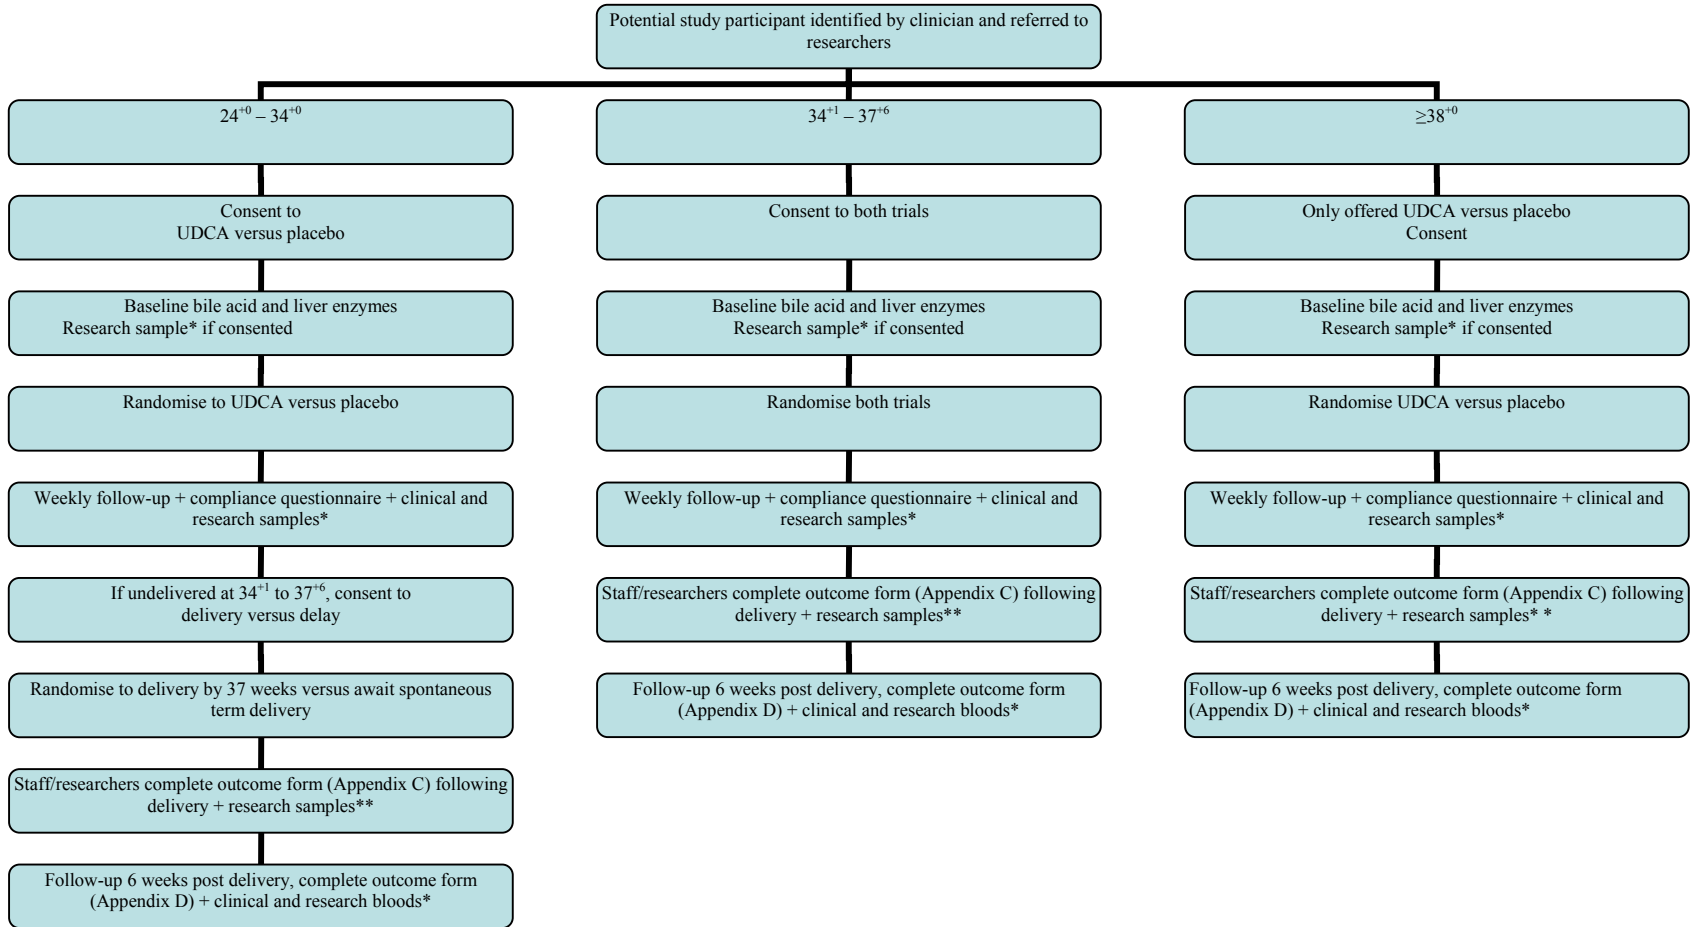

Research sample\*: Blood sample for DNA extraction (optional, if participant consents)

Research sample\*\*: Placental sample and cord blood sample (optional, if participant consents)
